1 **Colistin resistance in *Acinetobacter baumannii* is driven by multiple genomic traits:**  
2 **Evaluating the role of IS*Aba1*-driven *eptA* overexpression among Indian isolates**

3 Saranya Vijayakumar<sup>1</sup>, Jobin John Jacob<sup>1</sup>, Karthick Vasudevan<sup>1</sup>, Baby Abirami Shankar<sup>1</sup>, Maria  
4 Lincy Francis<sup>1</sup>, Agilandeewari Kirubananthan<sup>1</sup>, ShaliniAnandan<sup>1</sup>, Karthik Gunasekaran<sup>2</sup>,  
5 KaminiWalia<sup>3</sup>, Indranil Biswas<sup>4</sup>, Keith S Kaye<sup>5</sup>, \*Balaji Veeraraghavan<sup>1</sup>

6 <sup>1</sup> Department of Clinical Microbiology, Christian Medical College, Vellore – 632004, India

7 <sup>2</sup> Department of Medicine, Christian Medical College, Vellore – 632004, India

8 <sup>3</sup> Division of Epidemiology and Communicable Diseases, Indian Council for Medical Research,  
9 New Delhi – 110029, India

10 <sup>4</sup> Department of Microbiology, Molecular Genetics and Immunology, University of Kansas  
11 Medical Center, United States of America

12 <sup>5</sup> Division of Infectious Diseases, University of Michigan Medical School

13 **Running title:** Characterization of colistin resistance among Indian isolates of *A. baumannii*

14 \*Corresponding author:

15 Dr. V. Balaji

16 Professor

17 Department of Clinical Microbiology

18 Christian Medical College

19 Vellore – 632 004

20 Tamil Nadu, India

21 Ph: +91 9442210555

22 E-mail: vbalaji@cmcvellore.ac.in

23

24 **Abstract**

25 Colistin resistance in *Acinetobacter baumannii* is mediated by multiple mechanisms. Recently,  
26 mutations within *pmrAB* two component system and overexpression of *eptA* due to upstream  
27 insertion of *ISAbal* play a major role. To characterize colistin resistance mechanisms among the  
28 clinical isolates of *A. baumannii* in India. A total of 224 clinical isolates of *A. baumannii*  
29 collected from 2016 to 2019 were included in this study. Mutations within lipid A biosynthesis  
30 and *pmrAB* genes were characterized by Whole Genome Shotgun sequencing. Twenty eight  
31 complete genomes were further characterized for insertional inactivation of *lpx* genes and the  
32 association of *ISAbal-eptA* using hybrid assembly approach. Non-synonymous mutations like  
33 M12I in *pmrA*, A138T and A444V in *pmrB* and E117K in *lpxD* were identified. Four of the five  
34 colistin resistant *A. baumannii* isolates had insertion of *ISAbal* upstream *eptA*. No *mcr* genes  
35 were identified. Overall, the present study highlights the diversity of colistin resistance  
36 mechanisms in *A. baumannii*. *ISAbal*-driven *eptA* overexpression could be responsible for  
37 colistin resistance among Indian isolates of colistin resistant *A. baumannii*.

38

39

40

41

42

43

44

## 45 Introduction

46 *Acinetobacter baumannii* is a major nosocomial pathogen which is responsible for wide  
47 range of infections and has been reported as a public health problem globally [1, 2]. Multi-drug  
48 and extensively-drug resistant *A. baumannii* have been reported world-wide which results in the  
49 paucity of treatment options against *Acinetobacter* infections [3]. Carbapenems are considered to  
50 be the last-line antibiotics for treating *A. baumannii* infections and more than 80% resistance to  
51 carbapenem was reported [4]. More than 60% mortality rates have been reported for the most  
52 common carbapenem resistant *A. baumannii* (CRAB) infections like blood stream infections  
53 (BSI) and hospital-acquired pneumonia (HAP) [5].

54 Recently, World Health Organization (WHO) categorized CRAB as “Priority one”  
55 pathogen in the global list of antibiotic-resistant bacteria for the development of new antibiotics  
56 [3]. The most common antimicrobials considered for treating CRAB include colistin-based,  
57 tigecycline-based and sulbactam-based combinations [6]. Unfortunately, increased usage of  
58 colistin for treating *Acinetobacter* infection results in resistance to these last-line drugs [7].

59 In *A. baumannii* colistin resistance is mediated by multiple mechanisms [8]. This  
60 includes, (i) Loss of lipopolysaccharide (LPS) production, due to mutations in lipid A  
61 biosynthesis genes like *lpxA*, *lpxC* and *lpxD*. In addition, insertional inactivation of *lpxACD*  
62 genes due to insertion element, *ISAbal1* causes both loss of LPS and increased colistin  
63 resistance [9, 10]. (ii) Point mutations in *pmrA* and *pmrB* genes of *pmrAB* two component system  
64 (TCS) results in decreased membrane permeability leading to colistin resistance [11]. (iii)  
65 Recently, Gerson et al reported the presence of phosphoethanolamine (pEtN) transferase *eptA*, a  
66 homologue of *pmrC* and insertion of *ISAbal* upstream *eptA* results in overexpression and high

67 colistin resistance [3] and (iv) Colistin resistance due to plasmid mediated pEtN transferase, *mcr*  
68 genes [12].

69 In this study, a total of 224 clinical isolates of *A. baumannii* were characterized for their  
70 susceptibility profile and multiple resistance mechanism that contributes to colistin resistance. In  
71 addition, subset of complete genomes were characterized to investigate the inactivation of *lpxA*  
72 or *lpxC* by *ISAbal1* and to decipher the presence of *ISAbal* upstream *eptA*.

## 73 **Materials and methods**

### 74 **Bacterial isolates**

75 A total of 1214 consecutive non-duplicate clinical isolates of *A. baumannii* collected  
76 during January 2016 to December 2019 from the routine cultures of clinical samples, blood  
77 (n=314) and endo-tracheal aspirate (ETA) (n=900) were included in this study. All the isolates  
78 were identified up to the species level as *Acinetobacter baumannii calcoaceticus* complex (*Acb*  
79 complex) using conventional biochemical methods [13]. MALDI-TOF was used to confirm at  
80 the species level as *Acinetobacter baumannii*. Further confirmation of *Acb* complex as *A.*  
81 *baumannii* was performed targeting chromosomally encoded *bla*<sub>OXA-51 like</sub> gene by PCR [14].

### 82 **Anti-microbial susceptibility testing (AST)**

83 AST was performed for all the isolates against different classes of antibiotics by Kirby  
84 Bauer disc diffusion (DD) method and interpreted according to Clinical Laboratory Standards  
85 Institute (CLSI) guidelines [15]. The antibiotics tested includes ceftazidime, cefepime,  
86 piperacillin/tazobactam , cefoperazone/Sulbactam, imipenem, meropenem , aztreonam,  
87 amikacin, netilmycin, tobramycin, levofloxacin, tetracycline, minocycline, tigecycline and  
88 trimethoprim-sulfamethoxazole.

## 89 **Minimum inhibitory concentration (MIC) by broth micro dilution (BMD)**

90 As recommended by CLSI 2017 guidelines, colistin MIC was determined for all the  
91 blood and ETA isolates using broth micro dilution (BMD) and interpreted accordingly [16].  
92 *Escherichia coli* ATCC 25922 and *Pseudomonas aeruginosa* ATCC 27853 were used as quality  
93 control (QC) strains. Also, *mcr-1* positive *E. coli* was used as an internal control. Two in-house  
94 quality controls, *Klebsiella pneumoniae* BA38416 with MIC of 0.5 µg/ml and *Klebsiella*  
95 *pneumoniae* BA25425 with 16 µg/ml were also included in every batch of testing.

## 96 **Whole genome sequencing (WGS), assembly and annotation**

97 A subset of 224 clinical isolates of *A. baumannii* (Blood = 117 & ETA = 107) were  
98 selected based on the susceptibility profile for further characterization by WGS. Genomic DNA  
99 was extracted using QIAamp DNA Mini Kit (QIAGEN, Hilden, Germany) according to the  
100 manufacturer's instructions and WGS was performed. In brief, short read sequencing was  
101 performed using IonTorrent™ Personal Genome Machine™ (PGM) (Life Technologies,  
102 Carlsbad, CA) with 400-bp read chemistry or Illumina MiSeq as per the manufacturer's  
103 instructions. Long read sequencing was performed using SQK-LSK108 Kit R9 version (Oxford  
104 Nanopore Technologies, Oxford, UK) using 1D sequencing method according to the  
105 manufacturer's protocol. To obtain complete genome, hybrid assembly was performed for a  
106 subset of 28 genomes (Blood = 21 and ETA = 7) using long reads from MinION and short reads  
107 from either IonTorrent or Illumina as described previously [17].

108 All the genomes were assembled and annotated using the NCBI Prokaryotic Genome  
109 Annotation Pipeline (PGAP). Furthermore, downstream analysis was done using tools from  
110 Center for Genomic Epidemiology (CGE) server (<http://www.genomicepidemiology.org/>).

111 Antimicrobial resistance genes (ARG) were using ResFinder 3.0 database  
112 (<https://cge.cbs.dtu.dk/services/ResFinder/>) [18]. Sequence type of the isolates was assigned by  
113 MLST 2.0 tool using the Oxford scheme (*gltA*, *gyrB*, *gdhB*, *recA*, *cpn60*, *gpi*, and *rpoD* genes)  
114 (<https://cge.cbs.dtu.dk/services/MLST/>) [19]. SNP based phylogenetic tree was constructed and  
115 meta-data like colistin susceptibility, chromosomal mutation profile and International Clones  
116 were added using iTOL (<https://itol.embl.de/>) [20].

### 117 **Mutation analysis of *lpxACD* and *pmrAB* genes**

118 *In-silico* mutation analysis of genes involved in lipid A biosynthesis pathway (*lpxA*,  
119 *lpxC* and *lpxD*) and *pmrAB* TCS (*pmrA* and *pmrB*) were determined in all the genomes using  
120 Blast analysis (<https://blast.ncbi.nlm.nih.gov>) and compared with the reference strain of *A.*  
121 *baumannii* ATCC 17978 (GenBank Accession Number CP000521). Other reference strains like  
122 *A. baumannii* AYE (GenBank Accession Number NC010410), *A. baumannii* ACICU (GenBank  
123 Accession Number NC010611) and ATCC 19606 (GenBank Accession Number CP046654)  
124 were included in the analysis to identify the genetic polymorphisms. Plasmid mediated colistin  
125 resistance determinant gene (*mcr*) were detected using Resfinder and by *in-silico* Blast analysis  
126 against the reference sequences of *mcr* genes reported so far [21]. In addition to the mutation  
127 analysis, all the 28 complete genomes were characterized manually for other colistin resistance  
128 mechanisms like insertional inactivation of *lpxA*, *lpxC* and *lpxD* genes due to insertion sequence,  
129 *ISAbal1* and over-expression of *pmrC* homologue, *eptA* due to upstream presence of *ISAbal*.

### 130 **Nucleotide accession numbers**

131 The Whole Genome Shotgun project has been deposited at DDBJ/ENA/GenBank under  
132 BioProject numbers PRJNA603876, PRJNA604897, PRJNA610496 and PRJNA610503. The

133 complete genome project has been deposited at DDBJ/ENA/GenBank under accession numbers  
134 AB01 (CP040080), AB02 (CP035672), AB03 (CP050388), AB04 (CP040040), AB05  
135 (CP040047), AB06 (CP040050), AB07 (CP035930), AB08 (CP038500), AB09 (CP038644),  
136 AB010 (CP040053), AB011 (CP040056), AB012 (CP040084), AB013 (CP040087), AB014  
137 (CP050421), AB015 (CP050403), AB016 (CP040259), AB017 (CP050385), AB018  
138 (CP050523), AB019 (CP050400), AB020 (CP050390), AB021 (CP050410), AB022  
139 (CP050412), AB023 (CP050415), AB024 (CP050425), AB025 (CP050432), AB026  
140 (CP051474), AB027 (CP050526) and AB028 (CP050401).

## 141 **Results**

### 142 **Bacterial isolates and AST**

143 All the study isolates (n=1214) were first identified as *Acb* complex and confirmed as *A.*  
144 *baumannii* by MALDI-TOF. *bla*<sub>OXA-51</sub> like PCR re-confirmed *Acb* complex as *A. baumannii*.  
145 AST revealed that 99% (Blood, n=313 and ETA, n=899) of the study isolates were extensively  
146 drug resistant (XDR) and showed resistance to all the tested antibiotics. Of the remaining two  
147 isolates, one from ETA was pan-susceptible (AB01- Accession No. CP040080) while the other  
148 from blood was multi-drug resistant (MDR). The MDR (AB025 - Accession No. CP050432)  
149 isolate was resistant to cephalosporins, fluoroquinolones, aminoglycosides, tetracyclines,  
150 tigecycline and trimethoprim-sulfamethoxazole while susceptible to carbapenems.

### 151 **Determination of colistin MIC by BMD**

152 Among the tested isolates, 10.8% (n=34) from blood and 8.2% (n=74) from ETA were  
153 colistin resistant *A. baumannii* respectively. The colistin MIC range, MIC<sub>50</sub> and MIC<sub>90</sub> of the  
154 blood and ETA isolates were tabulated (Table 1).

## 155 **Characterization of various colistin resistance mechanisms using WGS**

156 A subset of 224 clinical isolates of *A. baumannii* was subjected to WGS based on the  
157 susceptibility profile. Of the 117 blood isolates, one isolate was MDR, 84 were carbapenem  
158 resistant-colistin susceptible *A. baumannii* (CR-ColSAB) and 32 were carbapenem -resistant-  
159 colistin resistant *A. baumannii* (CR-ColRAB). Similarly, among the 107 ETA, one was pan-  
160 susceptible, 46 were CR-ColSAB while 61 were CR-ColRAB.

161 Sequencing of *lpx* genes in both CR-ColSAB (n=131) and CR-ColRAB (n=93) revealed  
162 the presence of various amino acid substitutions. Within *lpxA*: Y131H, *lpxC*: C120R-P148S-  
163 F230Y-N287D and *lpxD*: Q4K-V63I-V93I-E117K-G166S-T287I-S299P substitutions were  
164 identified in comparison with the reference strain ATCC 17978. Three non-synonymous  
165 mutations Q4K, V63I and E117K within *lpxD* were identified in both CR-ColSAB and CR-  
166 ColRAB. Y131H, C120R and N287D substitutions were identified in all the three reference  
167 strains and all the CR-ColSAB and CR-ColRAB. Other amino-acid substitutions like P148S and  
168 F230Y in *lpxC*, V93I, G166S, T287I and S299P in *lpxD* were first described in this study. On the  
169 other hand, sequencing of *pmrAB* genes identified the following amino acid substitutions, *pmrA*:  
170 M12I and *pmrB*: A138T-L168S-A226T-V300E-G315A-P360Q-A444V. Single non-synonymous  
171 mutation, M12I in *pmrA* and A138T in *pmrB* was identified in all the CR-ColSAB and CR-  
172 ColRAB (Fig 1). None of the study isolates harbor any of the reported plasmid mediated colistin  
173 resistance determinant, *mcr-1* or its homologues.

174 Among the 28 complete genomes of *A. baumannii*, 21 were from blood of which 17 were  
175 CR-ColSAB while four were CR-ColRAB. Of the seven from ETA, five were CR-ColSAB, one  
176 was CR-ColRAB and one was pan-susceptible. Characterization of complete genomes for other  
177 colistin resistance mechanisms showed the presence of *ISAbal1* among two CR-ColSAB blood



178 isolates (AB016- Accession No. CP040259 & AB017- Accession No. CP050385), but no  
179 disruption of *lpxACD* observed. Atleast one copy of *eptA* was identified among 10 and 6  
180 genomes of CR-ColSAB from blood and ETA respectively whereas more than one copy was  
181 present in 12 genomes (7 CR-ColSAB and 4 CR-ColRAB from blood while one CR-ColRAB  
182 from ETA). *ISAbal* was found in opposite orientation upstream *eptA* in two genomes of CR-  
183 ColRAB from blood (AB02- Accession No. CP035672 & AB05- Accession No. CP040047) and  
184 in one CR-ColRAB from ETA (AB03- Accession No. CP050388). *ISAbal* was present in direct  
185 orientation upstream *eptA* in one CR-ColRAB blood isolate (AB04- Accession No. CP040040).  
186 Two CR-ColSAB from blood have IS4 transposase but not upstream *eptA* (AB010- Accession  
187 No. CP040053 & AB011- Accession No. CP040056) whereas four CR-ColSAB from blood  
188 (AB08- Accession No. CP038500, AB09- Accession No. CP038644, AB025- Accession No.  
189 CP050432 and AB015- Accession No. CP050403) have other family transposases (Fig 2 - 3). In  
190 one CR-ColRAB (AB06- Accession No. CP040050), only amino-acid substitutions, Y131H in  
191 *lpxA*, C120R and N287D in *lpxC*, P148S and G315D in *lpxD* were identified while the other  
192 colistin resistance mechanisms were absent. The overall colistin resistance mechanisms  
193 characterized among the 28 hybrid genomes were described in (Table 2.)

#### 194 **MLST**

195 MLST Finder revealed that both CR-ColSAB and CR-ColRAB were classified into  
196 International Clones (ICs) - IC1, IC2, IC7, IC8, CC862 and singletons. Majority of the CR-  
197 ColSAB isolates (n=90) (69%) belongs to IC2 with diverse sequence types like ST848, ST349,  
198 ST451, ST218 and ST195. Whereas IC2 was the only lineage with ST848 among the CR-  
199 ColRAB isolates (n=73) (78 %). Lineage specific non-synonymous mutations like Q4K, V63I  
200 and E117K within *lpxD* belongs to IC8, IC7 and IC2 respectively. Single non-synonymous

201 mutation, M12I in *pmrA*, A138T in *pmrB* and the combination of A138T-A444V within *pmrB*  
202 belongs to IC2.

## 203 **Discussion**

204 Colistin is considered as one of the few therapeutic options available against CRAB  
205 infections and due to increased usage, colistin resistance rate is gradually increasing globally and  
206 becoming a healthcare concern [22]. In the current study, 8% to 11% colistin resistance has been  
207 observed. Reports from other countries showed increased colistin resistance rates of 16.7% from  
208 Bulgaria, 19.1% from Spain and 27% from Greece [23 - 25]. Therefore, it is important to explore  
209 and understand the mechanisms that contribute to colistin resistance which is an utmost need for  
210 routine surveillance [3]. Several mutations and genetic polymorphisms have been reported within  
211 *lpxACD* and *pmrAB* genes by various studies using WGS which is in concurrence with the  
212 current study [9, 10].

213 In this study, clinical isolates of CR-ColRAB and CR-ColSAB were characterized for  
214 multiple colistin resistance mechanisms. Mutation analysis in *lpxACD* identified three non-  
215 synonymous mutations; Q4K, V63I and E117K within *lpxD* in both CR-ColRAB and CR-  
216 ColSAB which concurs with previous studies [26, 27]. Recent studies report that mutations in  
217 *pmrB* as the major contributor for colistin resistance in *A. baumannii* [24, 26, 28, 29]. The current  
218 study identified a non-synonymous mutation, A138T in *pmrB* while previous studies report other  
219 amino-acid substitutions together with A138T which is contrary to the current study [24, 26, 29].  
220 In *pmrA*, a single non-synonymous mutation, M12I was first identified by Arroyo et al who also  
221 reported the association of M12I with colistin hetero-resistance [24, 26, 30]. In contrast, other  
222 studies reported G54E substitution within *pmrA* which was not identified in this study [29, 31].  
223 Several studies reported the presence of mutations in *lpxD* along with *pmrB* genes [29]. In this

224 study, both CR-ColRAB and CR-ColSAB has *lpxD* mutation, E117K in combination with  
225 A138T-A444V mutation in *pmrB*. This observation indicates that mutations in *lpxD* alone and  
226 *pmrB* alone may not be sufficient to induce colistin resistance and support the presence of  
227 synergistic activity of mutations within these genes in promoting colistin resistance [26].

228 Two MLST schemes, PubMLST (Oxford) and Pasteur MLST are available for *A.*  
229 *baumannii* [32]. Earlier studies reported IC2/global clone 2 (GC2) as the predominant lineage  
230 associated with outbreaks [8]. This finding correlates with the current study and identified in  
231 both CR-ColRAB and CR-ColSAB In the present study, IC1/GC1 was identified among CR-  
232 ColSAB which is contrast to Snyman et al where GC1 was identified in both CR-ColSAB and  
233 CR-ColRAB [33]. Interestingly, lineage specific non-synonymous mutations, such as Q4K  
234 which belongs to IC8, V63I which belongs to to IC7 and E117K-M12I-A138T which belongs to  
235 IC2 were observed in this study and such findings have not been previously reported.

236 Moffatt et al was the first to report on the role of *ISAbalI* which causes insertional  
237 inactivation of *lpxA* or *lpxC* and leads to loss of LPS production and colistin resistance [10].  
238 Mutations in *lpxC* gene due to insertion of *ISAbalI* and increased colistin resistance were  
239 recently reported by Marta et al [34]. The current study revealed the presence of *ISAbalI* in two  
240 CR-ColSAB without disruption of *lpxA* or *lpxC* which is inconsistent with the previous studies.

241 *eptA* is a *pmrC* homologue with pEtN transferase activity [8]. In this study, *eptA* was  
242 present in both CR-ColSAB and CR-ColRAB and comparable with previous studies [3, 7 - 8,  
243 35]. However, the presence of *ISAbalI* upstream *eptA* was identified only among the CR-  
244 ColRAB which results in overexpression of PetN transferase encoded either by *pmrC* or *eptA*  
245 and responsible for colistin resistance. Such findings are comparable with other studies whereas  
246 another study observed in both CR-ColSAB and CR-ColRAB [3, 7 - 8]. Presence of other family

247 transposases were noticed among the CR-ColSAB which could be novel and further studies are  
248 necessary. Other colistin resistance mechanisms like disruption of *eptA* by *ISAbal25* and  
249 increased expression of *eptA* due to the presence of *ISAbal* in reverse orientation upstream *eptA*  
250 were reported recently [3]. Though difference in the orientation of *ISAbal* with respect to *eptA*  
251 was identified in this study, no expression studies were done to confirm the same.

252 In 2016, plasmid mediated PetN transferase, *mcr-1* was identified from China that  
253 contributed to colistin resistance to *E. coli* [36]. Currently, nine *mcr* types (*mcr* 1-9) and  
254 approximately 56 *mcr* variants are available in the GenBank database [37]. Though recent  
255 studies reported the presence of *mcr-4.3* in *A. baumannii* isolated from pig feces, food sample  
256 and clinical strains, none of the current study isolates harbor *mcr* genes [37 - 39].

257 Though colistin-based combinations can be considered for treating CRAB infections,  
258 various controversies have been reported recently with the usage of polymyxins [40]. Two global  
259 organizations, CLSI and EUCAST revised the interpretive criteria for *in-vitro* polymyxin  
260 susceptibility testing and suggested to prefer non-polymyxin agents for treating *Acinetobacter*  
261 infections [41]. Such revision would effectively helpful in considering polymyxin as a treatment  
262 option in selected cases [41]. Further clinical trials to determine the efficacy of novel agents like  
263 cefiderocol and eravacycline against BSI and VAP are recommended [42]. None of the newly  
264 available drug combinations have clinical activity against CRAB infections except for the novel  
265  $\beta$ -lactam-  $\beta$ -lactamase enhancer, cefepime-zidebactam [6, 42].

## 266 **Conclusion**

267 The current study provides characterization of multiple resistance mechanisms that could  
268 be responsible for colistin resistance among clinical isolates of *A. baumannii*. Previously  
269 reported non-synonymous mutations as well as other amino-acid substitutions that are not

270 described previously within *lpxD*, *pmrA* and *pmrB* genes were identified. Presence of *lpxD*  
271 mutation, E117K along with *pmrB* mutations A138T-A444V indicates the synergistic activity of  
272 mutations and results in colistin resistance. Recently, *mcr-4.3* on plasmids has been identified  
273 among clinical isolates of *A. baumannii* which is alarming. Two colistin susceptible isolates  
274 harbored *ISAbalI* and studies to understand the role of *ISAbalI* towards colistin resistance is  
275 essential. Though *pmrC* expression and addition of pEtN transferase to lipid A was regulated by  
276 *pmrAB* TCS, that alone doesn't considered as a sole contributor of colistin resistance. The  
277 presence of *eptA* was quite common and insertion of *ISAbal* upstream *eptA* among colistin  
278 resistant isolates could be associated with colistin resistance. The exact resistance mechanism  
279 that contributes to colistin was not elucidated for one isolate and requires further investigation.  
280 Overall, the present study highlights the diversity of colistin resistance mechanisms described in  
281 *A. baumannii* and for complete understanding further extensive studies are necessary.

282

### 283 **Acknowledgements**

284 The authors gratefully acknowledge the Institutional Review Board of the Christian Medical  
285 College, Vellore (83-i/11/13) and Indian Council of Medical Research, New Delhi, India (ref. no  
286 AMR/TF/54/13ECDHIII dated 23/10/2013). The study is a part of the PhD. Dissertation under  
287 The Tamil Nadu Dr. M.G.R. Medical University.

### 288 **Transparency declarations**

289 None to declare

290

291

## 292 **References**

- 293 1 Casallas JC, Robayo-Amortegui H, Corredor-Rozo Z *et al.* Bacteremia by colistin-resistant  
294 *Acinetobacter baumannii* isolate: a case report. *J Med Case Rep* 2019;13:141.
- 295 2 Vijayakumar S, Rajenderan S, Laishram S *et al.* Biofilm formation and motility depend on the  
296 nature of the *Acinetobacter baumannii* clinical isolates. *Front Public Health* 2016; 24:105.
- 297 3 Gerson S, Betts JW, Lucaßen K *et al.* Investigation of novel *pmrB* and *eptA* mutations in  
298 isogenic *Acinetobacter baumannii* isolates associated with colistin resistance and increased  
299 virulence in vivo. *Antimicrob Agents Chemother* 2019;63:e01586-18.
- 300 4 Hsu LY, Apisarnthanarak A, Khan E *et al.* Carbapenem-resistant *Acinetobacter baumannii* and  
301 *Enterobacteriaceae* in south and southeast Asia. *Clin Microbiol Rev* 2017;30:1-22.
- 302 5 Wong D, Nielsen TB, Bonomo RA *et al.* Clinical and pathophysiological overview of  
303 *Acinetobacter* infections: a century of challenges. *Clin Microbiol Rev* 2017;30:409-47.
- 304 6 Piperaki ET, Tzouvelekis LS, Miriagou V *et al.* Carbapenem-resistant *Acinetobacter*  
305 *baumannii*: in pursuit of an effective treatment. *Clin Microbiol Infect* 2019;25:951-7.
- 306 7 Trebosc V, Gartenmann S, Tötzl M *et al.* Dissecting Colistin Resistance Mechanisms in  
307 Extensively Drug-Resistant *Acinetobacter baumannii* Clinical Isolates. *mBio.* 2019;10:e01083-  
308 19.
- 309 8 Potron A, Vuilleminot JB, Puja H *et al.* IS<sub>Aba1</sub>-dependent overexpression of *eptA* in clinical  
310 strains of *Acinetobacter baumannii* resistant to colistin. *J Antimicrob Chemother* 2019; 74:2544-  
311 50.

- 312 9 Moffatt JH, Harper M, Harrison P *et al.* Colistin resistance in *Acinetobacter baumannii* is  
313 mediated by complete loss of lipopolysaccharide production. *Antimicrob Agents Chemother*  
314 2010 ;54:4971-7.
- 315 10 Moffatt JH, Harper M, Adler B *et al.* Insertion sequence ISAbal1 is involved in colistin  
316 resistance and loss of lipopolysaccharide in *Acinetobacter baumannii*. *Antimicrob Agents*  
317 *Chemother* 2011;55:3022-4.
- 318 11 Cai Y, Chai D, Wang R *et al.* Colistin resistance of *Acinetobacter baumannii*: clinical reports,  
319 mechanisms and antimicrobial strategies. *J Antimicrob Chemother* 2012;67:1607-15.
- 320 12 Liu YY, Wang Y, Walsh TR *et al.* Emergence of plasmid-mediated colistin resistance  
321 mechanism MCR-1 in animals and human beings in China: a microbiological and molecular  
322 biological study. *Lancet Infect Dis* 2016;16:161-8.
- 323 13 Vijayakumar S, Biswas I, Veeraraghavan B *et al.* Accurate identification of clinically  
324 important *Acinetobacter* spp.: an update. *Future Sci OA* 2019;5:FSO395.
- 325 14 Turton JF, Woodford N, Glover J *et al.* Identification of *Acinetobacter baumannii* by  
326 detection of the blaOXA-51-like carbapenemase gene intrinsic to this species. *J Clin Microbiol*  
327 2006;44:2974-6.
- 328 15 Clinical and Laboratory Standards Institute. (2019) Performance Standards for Antimicrobial  
329 Susceptibility Testing: Twenty nine Informational Supplement M100-S29. CLSI, Wayne, PA,  
330 USA

- 331 16 Clinical and Laboratory Standards Institute. (2017) Performance Standards for Antimicrobial  
332 Susceptibility Testing: Twenty seven Informational Supplement M100-S27. CLSI, Wayne, PA,  
333 USA
- 334 17 Vasudevan K, Ragupathi NK, Jacob JJ *et al.* Highly accurate-single chromosomal complete  
335 genomes using IonTorrent and MinION sequencing of clinical pathogens. *Genomics*.  
336 2020;112:545-51.
- 337 18 Zankari E, Hasman H, Cosentino S *et al.* Identification of acquired antimicrobial resistance  
338 genes. *J Antimicrob Chemother* 2012;67:2640-44.
- 339 19 Larsen M.V, Cosentino S, Rasmussen S *et al.* Multilocus sequence typing of total-genome-  
340 sequenced bacteria. *J Clin Microbiol* 2012;50: 1355-61.
- 341 20 Letunic I, Bork P. Interactive tree of life (iTOL) v3: an online tool for the display and  
342 annotation of phylogenetic and other trees. *Nucleic acids research*. 2016;44:W242-5.
- 343 21 Partridge SR, Di Pilato V, Doi Y *et al.* Proposal for assignment of allele numbers for mobile  
344 colistin resistance (*mcr*) genes. *J Antimicrob Chemother* 2018;73:2625-30.
- 345 22 Cafiso V, Stracquadanio S, Lo Verde F *et al.* Colistin resistant *A. baumannii*: genomic and  
346 transcriptomic traits acquired under colistin therapy. *Front Microbiol* 2019;9:3195.
- 347 23 Nowak J, Zander E, Stefanik D *et al.* High incidence of pandrug-resistant *Acinetobacter*  
348 *baumannii* isolates collected from patients with ventilator-associated pneumonia in Greece, Italy  
349 and Spain as part of the MagicBullet clinical trial. *J Antimicrob Chemother* 2017;72:3277-82.
- 350 24 Mustapha MM, Li B, Pacey MP, Mettus RT *et al.* Phylogenomics of colistin-susceptible and  
351 resistant XDR *Acinetobacter baumannii* *J Antimicrob Chemother* 2018;73:2952-9.



- 352 25 Abdulzahra AT, Khalil MA, Elkhatab WF. First report of colistin resistance among  
353 carbapenem-resistant *Acinetobacter baumannii* isolates recovered from hospitalized patients in  
354 Egypt. *New Microbes New Infect* 2018;26:53-8.
- 355 26 Nurtop E, Bayındır Bilman F, Menekse S *et al.* Promoters of Colistin Resistance in  
356 *Acinetobacter baumannii* Infections *Microb Drug Resist* 2019;25:997-1002.
- 357 27 Haeili M, Kafshdouz M, Feizabadi MM. Molecular mechanisms of colistin resistance among  
358 pandrug-resistant isolates of *Acinetobacter baumannii* with high case-fatality rate in intensive  
359 care unit patients *Microb Drug Resist* 2018;24:1271-6.
- 360 28 Charretier Y, Diene SM, Baud D *et al.* Colistin heteroresistance and involvement of the  
361 PmrAB regulatory system in *Acinetobacter baumannii*. *Antimicrob Agents Chemother*  
362 2018;62:e00788-18.
- 363 29 Gerson S, Lucaßen K, Wille J *et al.* Diversity of amino acid substitutions in PmrCAB  
364 associated with colistin resistance in clinical isolates of *Acinetobacter baumannii*. *Int J*  
365 *Antimicrob Agents* 2020;55:105862.
- 366 30 Arroyo LA, Herrera CM, Fernandez L *et al.* The pmrCAB operon mediates polymyxin  
367 resistance in *Acinetobacter baumannii* ATCC 17978 and clinical isolates through  
368 phosphoethanolamine modification of lipid A. *Antimicrob Agents Chemother* 2011;55:3743-51.
- 369 31 Oikonomou O, Sarrou S, Papagiannitsis CC *et al.* Rapid dissemination of colistin and  
370 carbapenem resistant *Acinetobacter baumannii* in Central Greece: mechanisms of resistance,  
371 molecular identification and epidemiological data. *BMC Infect Dis* 2015;15:559.

- 372 32 Vijayakumar S, Mathur P, Kapil A *et al.* Molecular characterization & epidemiology of  
373 carbapenem-resistant *Acinetobacter baumannii* collected across India. *Indian J Med Res*  
374 2019;149:240.
- 375 33 Snyman Y, Whitelaw AC, Reuter S *et al.* Clonal expansion of colistin-resistant *Acinetobacter*  
376 *baumannii* isolates in Cape Town, South Africa. *Int J Infect Dis* 2020;91:94-100.
- 377 34 Carretero-Ledesma M, García-Quintanilla M, Martín-Peña R *et al.* Phenotypic changes  
378 associated with Colistin resistance due to Lipopolysaccharide loss in *Acinetobacter baumannii*.  
379 *Virulence* 2018;9:930-42.
- 380 35 Lesho E, Yoon EJ, McGann P *et al.* Emergence of colistin-resistance in extremely drug-  
381 resistant *Acinetobacter baumannii* containing a novel *pmrCAB* operon during colistin therapy of  
382 wound infections. *J Infect Dis* 2013;208:1142-51.
- 383 36 Nhu NT, Riordan DW, Nhu TD *et al.* The induction and identification of novel Colistin  
384 resistance mutations in *Acinetobacter baumannii* and their implications. *Sci Rep* 2016;6:1-8.
- 385 37 Ma F, Shen C, Zheng X *et al.* Identification of a novel plasmid carrying *mcr-4.3* in an  
386 *Acinetobacter baumannii* strain in China. *Antimicrob Agents Chemother* 2019;63:e00133-19.
- 387 38 Martins-Sorenson N, Snesrud E, Xavier DE *et al.* A novel plasmid-encoded *mcr-4.3* gene in a  
388 colistin-resistant *Acinetobacter baumannii* clinical strain. *J Antimicrob Chemother* 2020;75:60-4.
- 389 39 Bitar I, Medvecky M, Gelbicova T *et al.* Complete Nucleotide Sequences of *mcr-4.3*-  
390 Carrying Plasmids in *Acinetobacter baumannii* Sequence Type 345 of Human and Food Origin  
391 from the Czech Republic, the First Case in Europe. *Antimicrob Agents Chemother*  
392 2019;63:e01166-19.

393 40 Gurjar M. Colistin for lung infection: an update. *J Intensive Care* 2015;3:3.

394 41 Satlin MJ, Lewis JS, Weinstein MP *et al.* Clinical and Laboratory Standards Institute (CLSI)  
395 and European Committee on Antimicrobial Susceptibility Testing (EUCAST) position  
396 statements on polymyxin B and colistin clinical breakpoints. *Clin Infect Dis* 2020 Feb 13.

397 42 Bhagwat SS, Periasamy H, Takalkar SS *et al.* The novel  $\beta$ -lactam enhancer zidebactam  
398 augments the in vivo pharmacodynamic activity of cefepime in a neutropenic mouse lung  
399 *Acinetobacter baumannii* infection model. *Antimicrob Agents Chemother* 2019;63:e02146-18.

400

#### 401 **Figure Legends**

402 **Fig 1.** Phylogenetic tree of clinical isolates of colistin resistant and colistin susceptible *A.*  
403 *baumannii*. The outer ring shows isolates belonging to different International Clones (ICs), the  
404 middle rings depicts chromosomal mutations in both colistin resistant and susceptible isolates  
405 and the stars in the inner ring represents the colistin susceptibility of the clinical isolates of *A.*  
406 *baumannii*

407 **Fig 2:** Graphical representation of genetic arrangement of *pmrC* homologue, *eptA* with upstream  
408 presence of *ISAbal* among complete genomes of colistin resistant *A. baumannii* (A, B, C and D).  
409 The direction of arrow represents the orientation, *eptA* are shown as red-dotted arrow, *ISAbal* as  
410 purple-dotted arrow, *pmrA* as blue arrow, *pmrB* as green arrow. The genetic arrangement of  
411 isolate E has *eptA* without *ISAbal*

412

413 **Fig 3:** Graphical representation of genetic arrangement of *pmrC* homologue, *eptA* among  
414 complete genomes of colistin susceptible *A. baumannii*. The genetic arrangement of: A. *eptA*  
415 without insertion element, B. *eptA* with IS26 transposase, C. *eptA* with IS6 like element, D & E.  
416 *eptA* with IS4 transposase, F. *eptA* with IS256 transposase and G. *eptA* with IS66 transposase.  
417 The direction of arrow represents the orientation. *eptA* are shown by red-dotted arrow, IS26, IS6,  
418 IS256 and IS66 transposases as light green arrow, *pmrA* as blue arrows and *pmrB* as green arrow

tree scale: 1

### Chromosomal mutations

- Present
- Absent

### Colistin susceptible/resistant

- Colistin resistant
- Colistin susceptible

### International Clones

- IC1
- IC2
- IC7
- IC8
- CC862
- Novel
- Singleton

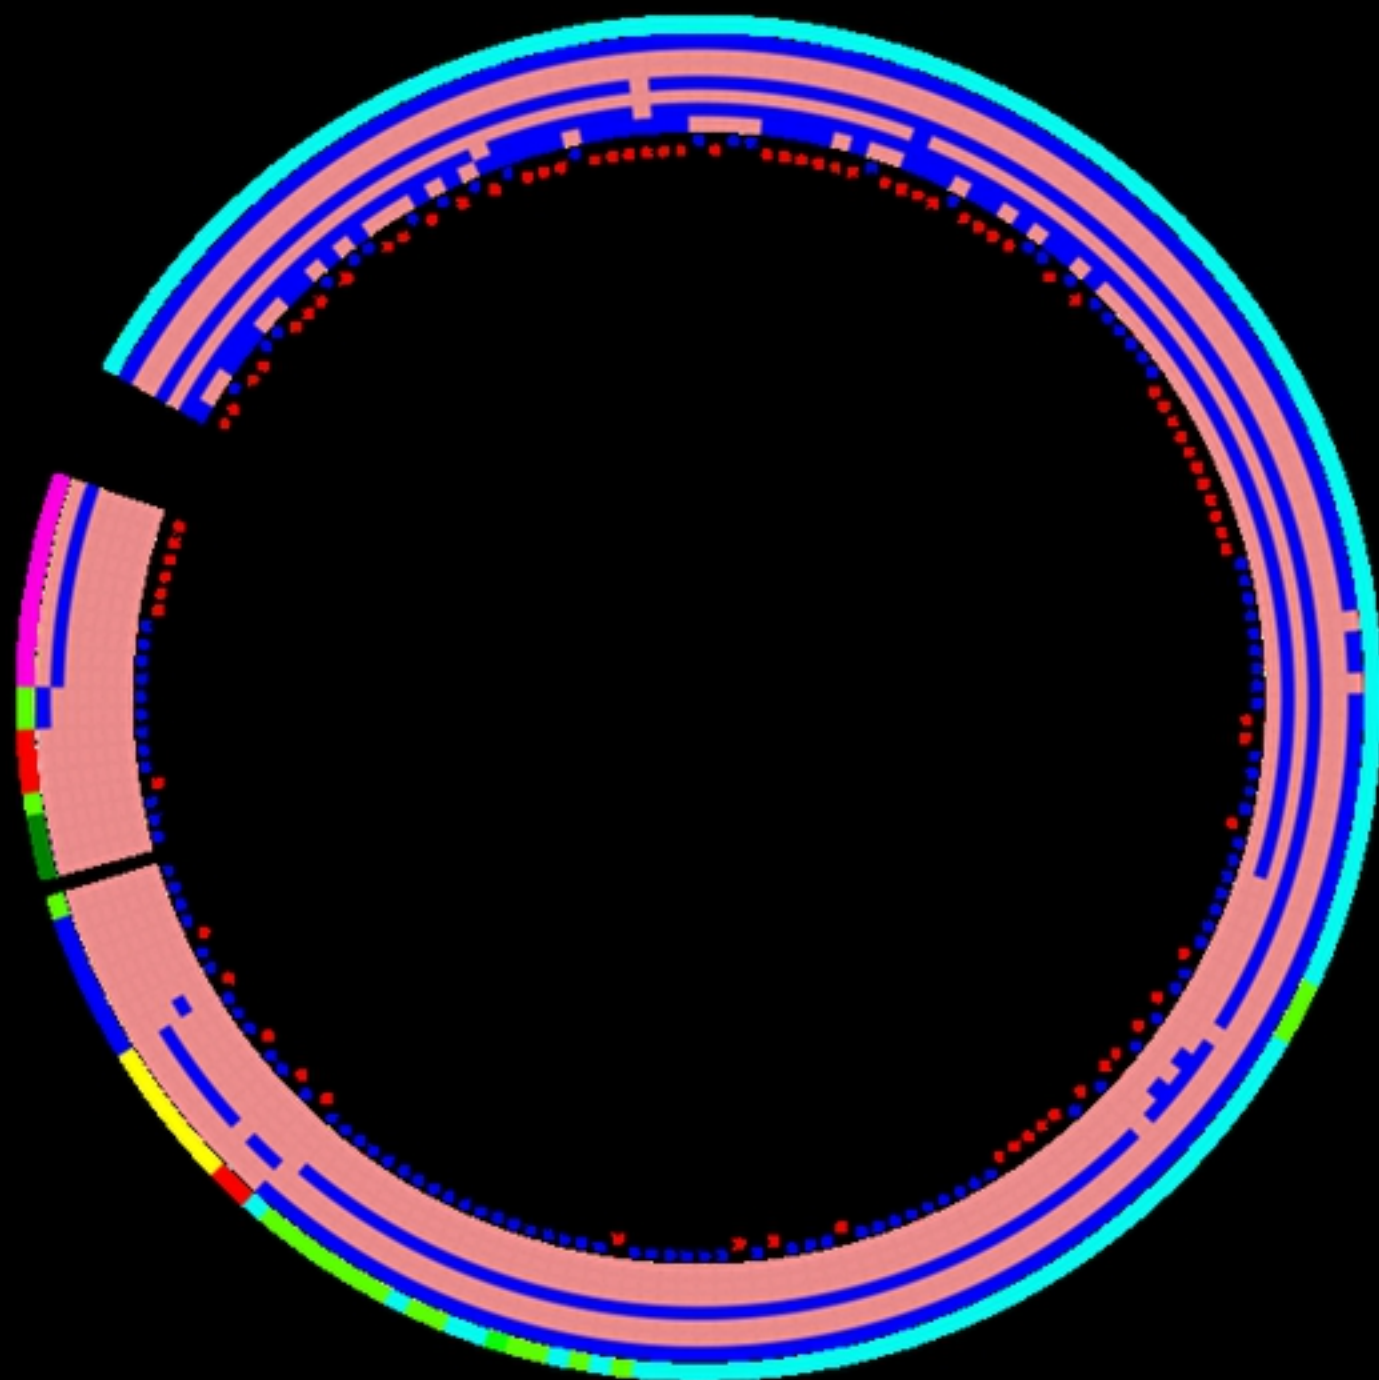

Figure

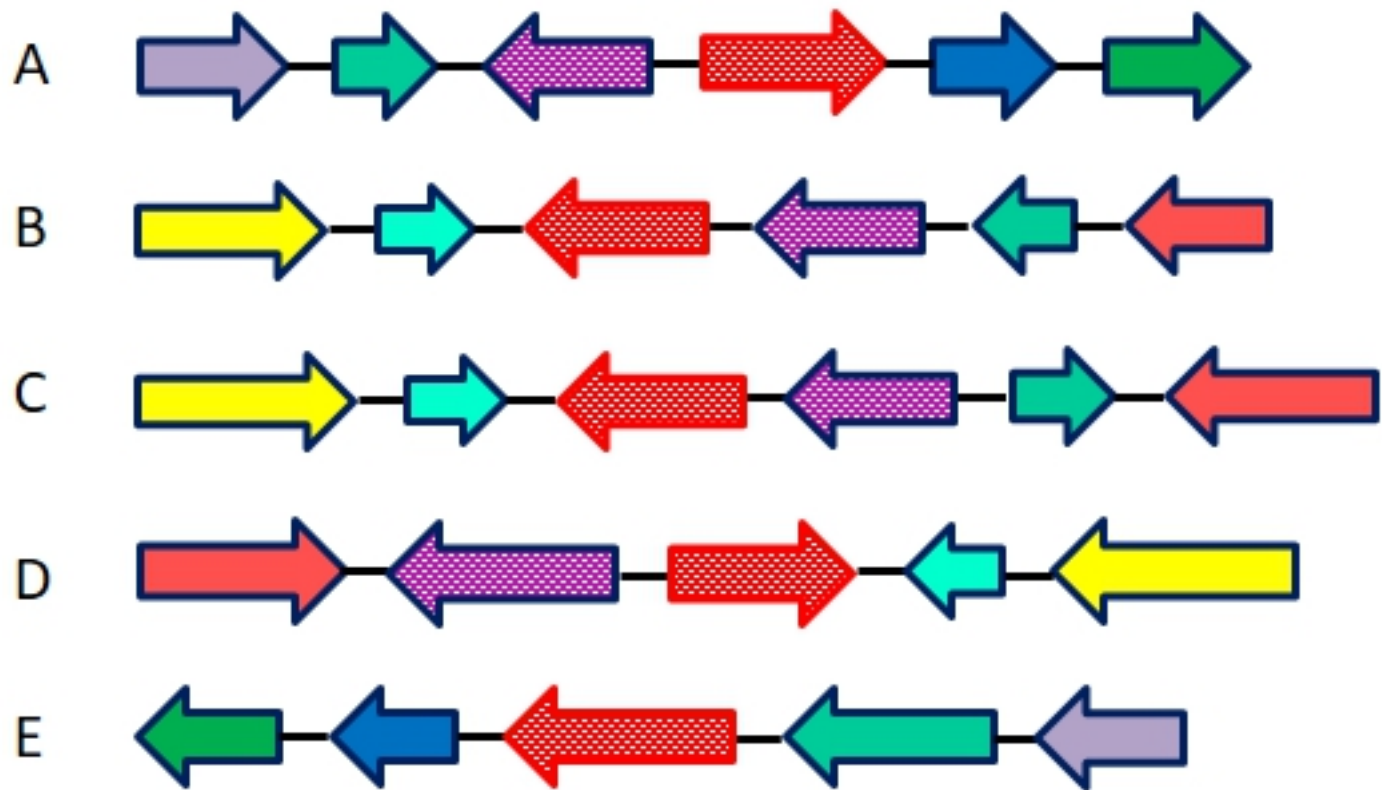

Figure

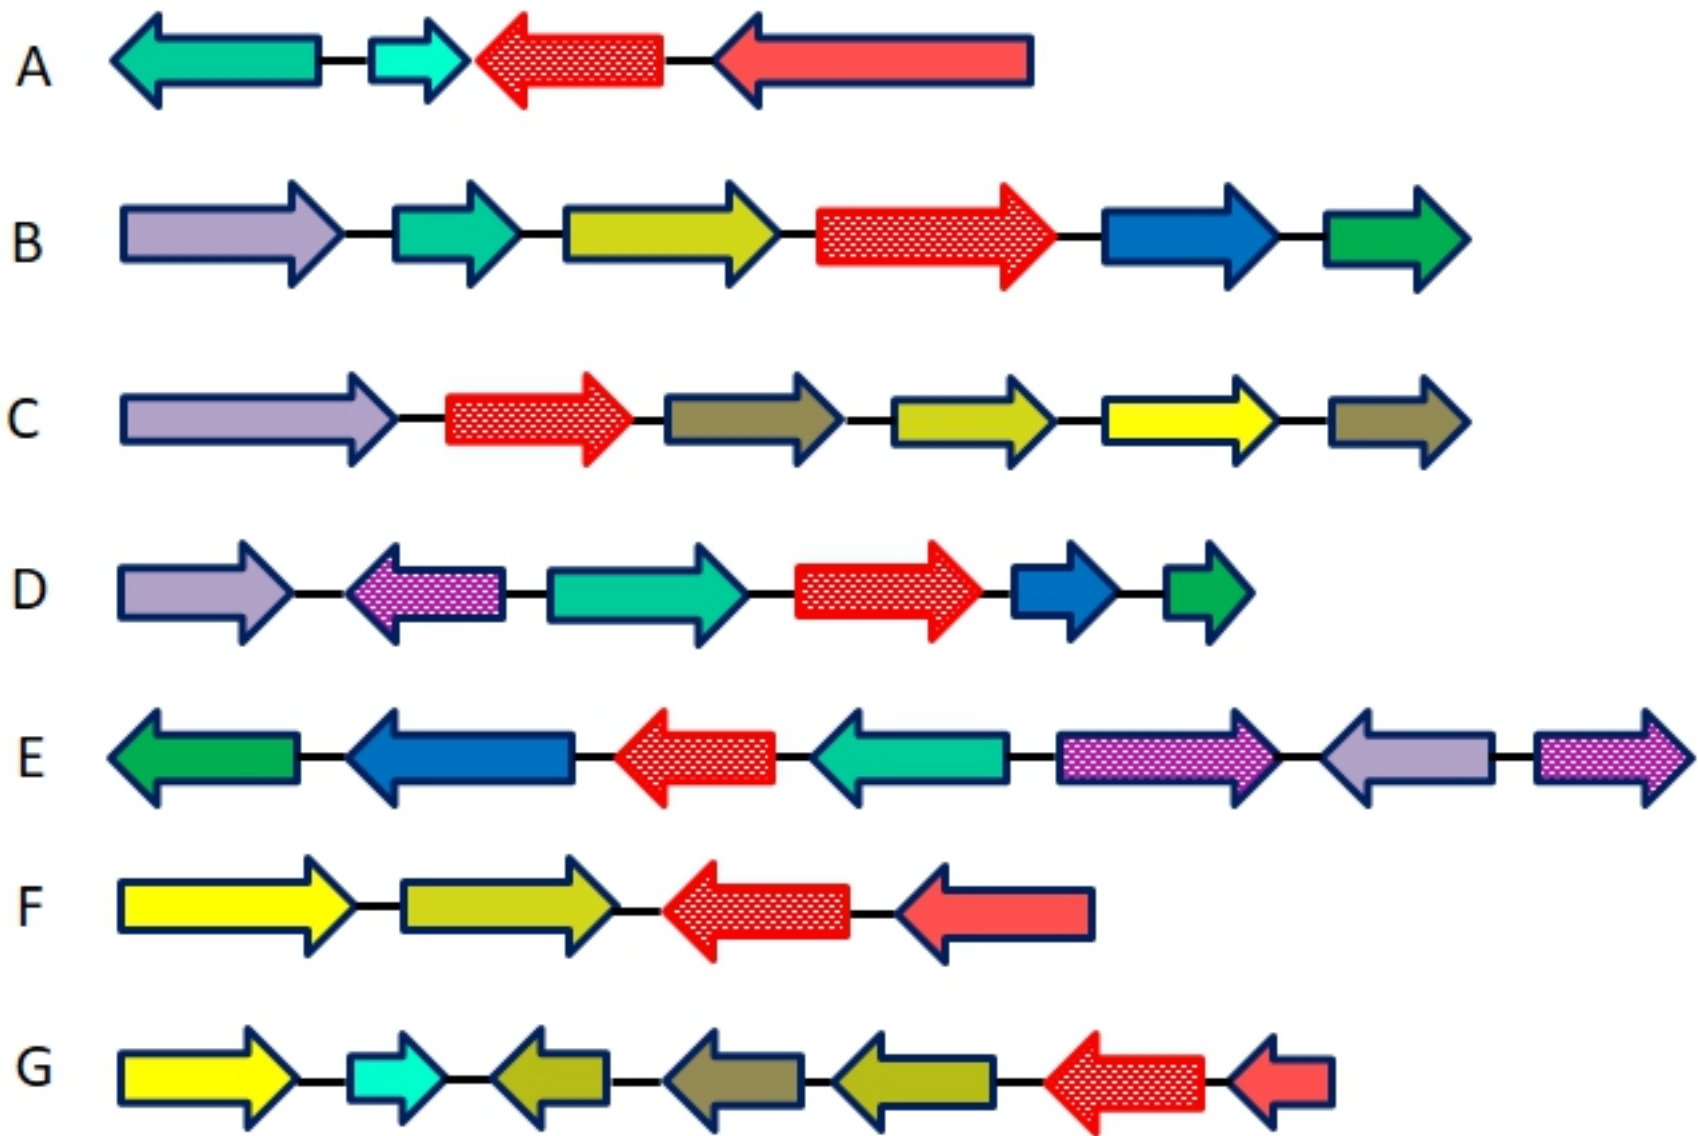

Figure

Table 1. MIC range, MIC<sub>50</sub> and MIC<sub>90</sub> of colistin for clinical isolates of *A. baumannii*

| <b>Colistin MIC (µg/ml)</b> | <b>Blood (n=314)</b> | <b>Respiratory (n=900)</b> |
|-----------------------------|----------------------|----------------------------|
| MIC range                   | 0.12 - 64            | 0.12 - 64                  |
| MIC <sub>50</sub>           | 0.5                  | 1                          |
| MIC <sub>90</sub>           | 2                    | 2                          |



Table 2. Cumulative findings of various colistin resistance mechanisms among complete genomes of *A. baumannii* (n=28)

| Isolate ID | Colistin susceptibility | Mutation profile |                     |             |             |              | IS <i>AbaI-epsA</i> | Insertional inactivation of <i>lpxACD</i> by IS <i>AbaI1</i> | Complete <i>lpxACD</i> genes | Accession number |
|------------|-------------------------|------------------|---------------------|-------------|-------------|--------------|---------------------|--------------------------------------------------------------|------------------------------|------------------|
|            |                         | <i>lpxA</i>      | <i>lpxC</i>         | <i>lpxD</i> | <i>pmrA</i> | <i>pmrB</i>  |                     |                                                              |                              |                  |
| AB01       | Pan-susceptible         | Y131H            | C120R, N287D        | Absent      | Absent      | Absent       | Absent              | Absent                                                       | Present                      | CP040080         |
| AB02       | Resistant               | Y131H            | C120R, N287D        | E117K       | Absent      | A444V        | Present             | Absent                                                       | <i>lpxA</i> absent           | CP035672         |
| AB03       | Resistant               | Y131H            | C120R, N287D, D159N | Q4K         | Absent      | Absent       | Present             | Absent                                                       | Present                      | CP050388         |
| AB04       | Resistant               | Y131H            | Absent              | E117K       | M12I        | A138T, A444V | Present             | Absent                                                       | <i>lpxC</i> absent           | CP040040         |
| AB05       | Resistant               | Y131H            | C120R, N287D        | E117K       | M12I        | A138T, A444V | Present             | Absent                                                       | Present                      | CP040047         |
| AB06       | Resistant               | Y131H            | C120R, N287D, P148S | Absent      | Absent      | G315D        | Absent              | Absent                                                       | Present                      | CP040050         |
| AB07       | Susceptible             | Y131H            | C120R, N287D, P148S | E117K       | Absent      | A444V        | Absent              | Absent                                                       | <i>lpxA</i> absent           | CP035930         |
| AB08       | Susceptible             | Y131H            | C120R, N287D        | Q4K         | Absent      | Absent       | Absent              | Absent                                                       | Present                      | CP038500         |
| AB09       | Susceptible             | Y131H            | C120R, N287D        | Absent      | Absent      | Absent       | Absent              | Absent                                                       | Present                      | CP038644         |
| AB10       | Susceptible             | Y131H            | C120R, N287D        | Q4K         | Absent      | Absent       | Absent              | Absent                                                       | Present                      | CP040053         |
| AB11       | Susceptible             | Y131H            | C120R, N287D, D159N | Q4K         | Absent      | Absent       | Absent              | Absent                                                       | Present                      | CP040056         |
| AB12       | Susceptible             | Y131H            | C120R, N287D        | E117K       | Absent      | A444V        | Absent              | Absent                                                       | Present                      | CP040084         |
| AB13       | Susceptible             | Y131H            | C120R, N287D, P148S | E117K       | Absent      | A444V        | Absent              | Absent                                                       | Present                      | CP040087         |
| AB14       | Susceptible             | Y131H            | C120R, N287D        | Absent      | Absent      | Absent       | Absent              | Absent                                                       | Present                      | CP040259         |
| AB05       | Susceptible             | Y131H            | C120R, N287D        | E117K       | Absent      | A444V        | Absent              | Absent                                                       | Present                      | CP050385         |
| AB16       | Susceptible             | Y131H            | C120R, N287D        | V63I, G166S | Absent      | Absent       | Absent              | IS <i>AbaI1</i> present without disruption                   | Present                      | CP050523         |

|      |             |       |                     |             |        |              |        |                                           |         |          |
|------|-------------|-------|---------------------|-------------|--------|--------------|--------|-------------------------------------------|---------|----------|
| AB17 | Susceptible | Y131H | C120R, N287D        | Absent      | Absent | Absent       | Absent | <i>ISAbal1</i> present without disruption | Present | CP050400 |
| AB18 | Susceptible | Y131H | C120R, N287D        | E117K       | Absent | A444V        | Absent | Absent                                    | Present | CP050390 |
| AB19 | Susceptible | Y131H | C120R, N287D, P148S | E117K       | Absent | A444V        | Absent | Absent                                    | Present | CP050410 |
| AB20 | Susceptible | Y131H | Absent              | E117K       | M12I   | A138T, A444V | Absent | Absent                                    | Present | CP050412 |
| AB21 | Susceptible | Y131H | C120R, N287D        | E117K       | M12I   | A138T, A444V | Absent | Absent                                    | Present | CP050415 |
| AB22 | Susceptible | Y131H | C120R, N287D, P148S | Absent      | Absent | G315D        | Absent | Absent                                    | Present | CP050425 |
| AB23 | Susceptible | Y131H | C120R, N287D        | Q4K         | Absent | Absent       | Absent | Absent                                    | Present | CP050432 |
| AB24 | Susceptible | Y131H | C120R, N287D        | Absent      | Absent | Absent       | Absent | Absent                                    | Present | CP051474 |
| AB25 | Susceptible | Y131H | C120R, N287D        | Q4K         | Absent | Absent       | Absent | Absent                                    | Present | CP050526 |
| AB26 | Susceptible | Y131H | C120R, N287D        | E117K       | Absent | A444V        | Absent | Absent                                    | Present | CP050401 |
| AB27 | Susceptible | Y131H | C120R, N287D, P148S | E117K       | Absent | A444V        | Absent | Absent                                    | Present | CP050421 |
| AB28 | Susceptible | Y131H | C120R, N287D        | V63I, G166S | Absent | Absent       | Absent | Absent                                    | Present | CP050403 |
